# Supplementary figures and images for: Adsorption of water molecules on partially oxidized graphite surfaces: a molecular dynamics study of the competition between OH and COOH sites,
Source: Royal Society of Chemistry journal article supplement (doi:10.1039/b811126j), 2008-01-01

**Figure S1**

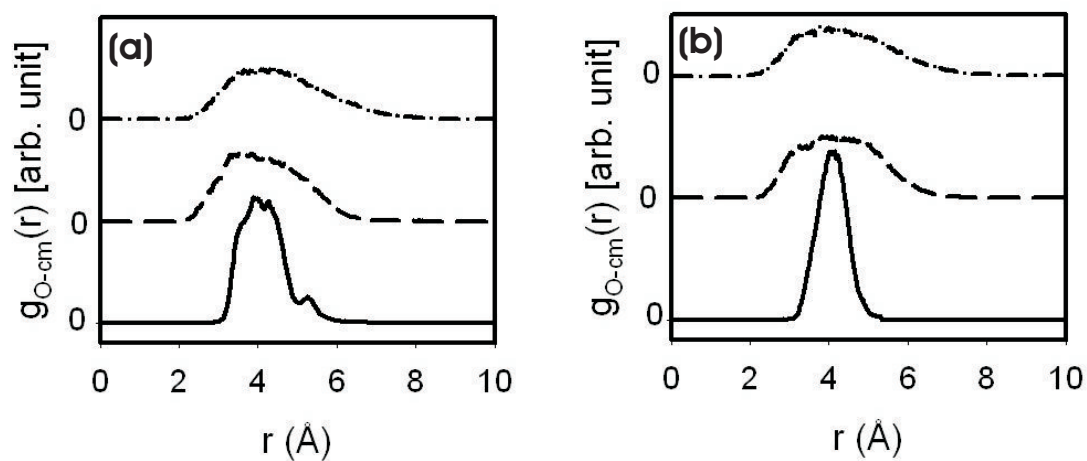

**Figure S2**

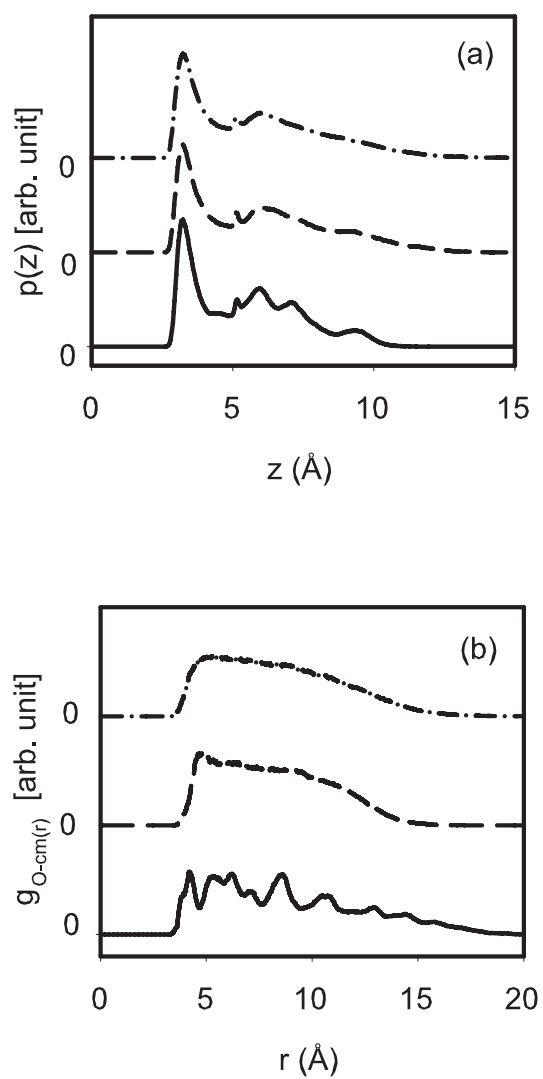

Supplement: b811126j.pdf [file b811126j.pdf]
